# Supplementary material for: Demographic, clinical and antibody characteristics of patients with digital ulcers in systemic sclerosis: data from the DUO Registry
Source: HighWire-hosted journal article supplement (doi:10.1136/annrheumdis-2011-200631), 2012-01-14
Supplement: annrheumdis-2011-200631supp_appendix.pdf [file annrheumdis-2011-200631supp_appendix.pdf]

The authors gratefully acknowledge all investigators involved in this registry.

**AT – AUSTRIA**

AMSTETTEN; M STETTER  
FELDKIRCH; K LACKNER, N TOMI  
GRAZ; F HAFNER, M BRODMANN  
INNSBRUCK; M KUEN-SPIEGEL  
KARNTEN; H KOLLE  
LINZ; B RAFFIER  
LINZ; N HAMBERGER, S METZ  
MUERZZUSCHLAG; C SIEBEL, M TRUMMER, R THONHOFER  
SALZBURG; X ILLMER  
ST POLTEN; F TRAUTINGER, P SCHMIDT  
STOCKERAU; B RINTELEN, J SAUTNER  
VIENNA; A WILLFORT-EHRINGER, C MARGETA  
VIENNA; B MONSHI, D PIRKHAMMER, L RICHTER  
VIENNA; G HOLZER  
VIENNA; G MINMAIR  
VIENNA; H BROLL  
VIENNA; M TAKACS  
VIENNA; M HIRSCHL  
VIENNA; P MESARIC  
VIENNA; R FELDMANN  
VIENNA; K SEMMELWEIS  
WELS; M HUNDSTORFER, V REINHART

**CH – SWITZERLAND**

ZURICH; B MAURER, D VERNER, O DISTLER, R SCHMIDT-BOSSHARD

**CZ – CZECH REPUBLIC**

BRNO; J BOHMOVA, L PROCHAZKOVA, P NEMEC  
BRNO; Z FOJTIK  
HRADEC KRALOVE; T SOUKUP  
JESENIK; A SMRZOVA  
PLZEN; D SUCHY  
PRAGUE; I ZEMANOVA  
PRAGUE; R BECVAR

**DE – GERMANY**

AACHEN; A GAWLIK, M KOCH, T RAUEN  
AACHEN; B VOSS  
AACHEN; R KURTHEN  
AUGSBURG; A UNHOLZER, H STARZ, J WELZEL, K PLAUMANN  
BAD AIBLING; B MERK, HH BLOCHING  
BAD BRAMSTEDT; F MOOSIG, P FREY, S KAHL  
BAD ENDBACH; H SCHLEENBECKER, K STORCK-MUELLER  
BAD KREUZNACH; A SCHWARTING, A HAZENBILLER, V NICHELMANN  
BAD KREUZNACH; W FLAIG  
BAD NAUHEIM; C RUMBAUR, I BOESENBERG, T SCHMEISER  
BAD STAFFELSTEIN; J MARX, L MAYER  
BASSUM; T STEIN  
BAYREUTH; W OCHS  
BERLIN; C RASCHE, M WORM  
BERLIN; G RIEMEKASTEN, K DEUSCHLE, M BECKER  
BERLIN; HJ KLEINER  
BERLIN; K SCHULZE

BOCHUM; C TIGGERS, J PETERS, J KIRSCHKE  
BONN; C SCHAEFER, M MONSHAUSEN, T MENGDEN  
BONN; F SADEGLAR, M SEIDEL  
BREMEN; C HILLEBRECHT, J ANDRESEN, R REEMTSEN  
DARMSTADT; F STOECKL, S SPERLING  
DARMSTADT; M PODDA, N WAGNER  
DORTMUND; J GUENZEL  
DRESDEN; I WUERZBURG, K LUETHKE  
DRESDEN; M ENDERLEIN, M KAYSER  
DUESSELDORF; A GERBER, M HAUST, NP HOFF, R MOTA, S AKANAY-DIESEL  
DUESSELDORF; K JAHNKE, S METTLER, S TOELLER, S ZWENGER  
EBENSFELD; E KLEIN, K HAHN  
ERLANGEN; C BEYER, J DISTLER  
ERLANGEN; A KATZEMICH, C ERFURT-BERGE, M STICHERLING  
ERLANGEN; F SCHUCH, P RAPP  
ESSEN; A MITCHELL, C FREUNDLIEB, U RUSHENTSOVA  
FRANKFURT; A HIMSEL, U HENKEMEIER  
FRANKFURT; P EILBACHER  
FRIEDRICHSDORF; C ULLRICH-GUENTHER, S NEUL  
GERA; M OELSNER  
GOETTINGEN; G HERMANN  
GREIFSWALD; M FIENE  
HAMBURG; A GAUSE  
HAMBURG; C MENSING, D KLINGS, H MENSING, J MESSALL, R ZUPER  
HAMBURG; D MAY  
HAMBURG; L BRUCKNER, N SHEIKH  
HAMBURG; P ARIES, S KIRCHBERG  
HELDENBERG; A FUNKERT, N BLANK, S LUPASCHKO,  
HEMAU; M SCHWUERZER-VOIT  
HOFHEIM; L MEIER, U HERR, U MEIER  
HOHENFELDE; G NEEK, H WERNITZSCH  
HOMBURG; C PFOEHLER  
HOMBURG; G ASSMANN, J VOSSWINKEL  
KARLSBAD; B KROG, E WOLLERSDORFER  
KIEL; J OLTSMANN-SCHROEDER, R ZEUNER, S UHLIG, S BARTH  
KIEL; R HUEGEL, R GLAESER  
KOELN; B RABE, J SCHUSTER, J SCHOLZ, K KREMER, M ROBAKIDZE-TORBAHN, P MOINZADEH  
LEIPZIG; M MITTAG  
LUEBECK; A DOHSE, A MUHLACK, L SCHULTZ, S SCHULT, Y FRAMBACH  
MAINZ; A KETTENBACH, I FELL, K SCHWEDA, K STEINBRINK, M PODOBINSKA  
MARKTREDWITZ; W HARMUTH  
MONCHENGLADBACH; C NIELEN  
MUENCHEN; A KACZMARCZYK, C KELLNER, J VON OELHAFEN, PB VON BILDERING, S KUNZE  
MUENCHEN; A NIEDERMEIER, G MESSER, M SARDY, V BEKOU  
MUENCHEN; B BELLONI, B HUETTIG, M ZIAI, R HEIN  
MUENSTER; A HALLECKER, M GAUBITZ  
MUENSTER; C HALLERMANN, K SCHMIDT  
MUENSTER; I HERRGOTT  
NEUBURG A.D. DONAU; B HILDEBRANDT  
NEUSS; E EIDEN, I GUERTLER  
PADERBORN; E GERNOT SCHEIBL, H BRAND  
PARCHING; U KAEDING  
PASSAU; E WEISS, N REISCHEL, S KERN  
PLAUEN; C BAUMANN  
PLOCHINGEN; B HELLMICH, C LOEFFLER, J PFLUGFELDER, P KARAENKE  
RECKLINGHAUSEN; J RUCHENBURG, J BLUME, M ZABEL, N DEPPERMAN, S CHROMIK  
REGENSBURG; C METZLER

REGENSBURG; E KRUPP, H RUMPEL  
REGENSBURG; J-O KRAUSE  
ROSTOCK; C KNEITZ, I FEDEROW, K SCHNEIDER, M SEMMLER, S HAPKE  
SCHLANGENBAD; A BARND  
STADTBERGEN; M LINKE  
STRAUBING; E KAMPE-JUZAK, K KNOEBEL  
STRAUBING; K NIEFANGER  
STUTTGAART; HU WILHELM  
TETTNANG; B LAUTERWEIN  
TUEBINGEN; G FIERLBECK, S SCHANZ  
ULM; C PFEIFFER, R HASSEL  
WANGEN/ALLGAU; H WAHN, K SCHILDT  
WEDEL; A VON ELLING, D BORO, J EBEL, K AHMADI  
WEIDEN; D MORITZ, S DIETL  
WETTSTETTEN; J DYBALLA  
WIESBADEN; B ALSHEIMER, N SCHUETZ  
WINSEN; T SCHUART  
WURZBURG; C MUEGLICH, HP TONY, P MARINA  
WURZBURG; F DEININGER, F HARTMANN

#### **DK – DENMARK**

ARHUS C; AB OLSEN, KH SONDERGAARD  
ARHUS C; Y NADERI  
KOBENHAVN NV; LV IVERSEN, T KARLSMARK  
ODENSE C; JB KNUDSEN

#### **ES – SPAIN**

A CORUNA; JG GIL, JCF LOPEZ, JAP TASENDE, MF GONZALES, AA SANDOVAL  
AVILA; M DEL CARMEN TORRES MARTIN, M CORTEGUERA  
AVILES; BA BARCA, IC MONTES, RG DE LA TORRE  
BARAKALDO; M VICTORIA EGURBIDE  
BARCELONA; A PROS, J MUNOZ  
BARCELONA; CP SIMEON  
BARCELONA; G ESPINOSA, G ESPINOSA, MAP RODRIGUEZ  
BARCELONA; I CASTELLVI  
BARCELONA; JM MASCARO  
CIUDAD REAL; D BELLIDO, VS MANZANEDO, M P HUERTAS, MDM SANCHEZ, MSS TRENADO, PV GARCIA  
CORDOBA; F GINES MARTINEZ, M ANGELES AQUIRRE,  
FERROL; AH DEL RIO, JLG VAZQUEZ, JV COLEMAN, MR LOPEZ, PS SANCHEZ  
GIJON; EMF AIZPURU, FJN MATEO  
GRANADA; JL CALLEJAS, N ORTEGO  
HOSPITALET; I CASTELLVI, MP SANTO  
HOSPITALET; M RUBIO  
HUELVA; I MARTIN  
LEGANES; A CRUZ, M CRESPO, PC RAMOS  
LUGO; A S-A FERNANDEZ, JAM FILLOY, TRV RODRIGUEZ  
MADRID; AR MARHUENDA, JJR BLANCO, MGB HERNAN  
MADRID; AZ MENDOZA, C DE LA PUENTE  
MADRID; EV RABANEDA, RG DE VICUNA  
MADRID; M DEL MAR RIPOLL MACIAS  
MADRID; PG DEL LA PENNA LEFEBVRE  
MALAGA; E DE RAMON, MT CAMPS  
MOSTOLES; C FERNANDEZ, R MIGUELEZ, J USON, EG DELGADO, V VILLAVERDE  
PONTEVEDRA; F MACEIRAS, J CRUZ, JA MOSQUERA  
SANTIAGO; A MERA, EP PAMPIN, JS BLANCO, JR MANEIRO, JJ DIAZ, L LOSADA, M CAAMANO, S FERNANDEZ, SA INSUA  
SEGOIVA; CU LAURIN

SEVILLA; J SANCHEZ  
TALAVERA DE LA REINA; NC FERNANDEZ, ND BECERRA  
TOLEDO; A GARCIA, GM NICOLAS  
VALDEMORO; M DEL CARMEN ORTEGA DE LA O  
VALENCIA; A RUEDA, J CALVO  
VALENCIA; J ROMAN IVORRA, JJ ALEGRE SANCHO  
VALLADOLID; J BARBADO  
VIGO; J MONTES  
ZARAGOZA; L SAEZ

**FI – FINLAND**

HELSINKI; A KAARTO  
TAMPERE; H MAKINEN

**FR – FRANCE**

ALBI; S MADAULE  
AMIENS; A DADBAN, C LOK  
BESANCON; D FERRANDIZ, MP MOITON, N MAGY-BERTRAND  
BORDEAUX; A TAIEB, C DROITCOURT, E BELIN, S BALQUIERE, S PREY  
BORDEAUX; C BOULON, J CONSTANS  
BORDEAUX; C RICHEZ  
BREST; B SASSOLAS, L MISERY, M GRECO  
DIJON; E COLLET  
DIJON; S BERTHIER, V LEGUY-SEGUIN  
LA TRONCHE; B IMBERT, P CARPENTIER, S BLAISE  
LE MANS; H MAILLARD, N BENETON  
LILLE; D LAUNAY, E HACHULLA, G WOIJTASIK, H CHARLANNE, M LAMBERT, N JOURDAIN, PY HATRON, S MORELL  
LIMOGES; A SPARS, A COURAUD, V DOEFFEL-HANTZ  
LIMOGES; AL FAUCHAIS, E VIDAL, G GOUDRAN, H BEZANAHARY, N BOUSSELY, P MANEA, S DUMONTEIL, V LOUSTAUD-RATTI  
LYON; A HOT, B COPPERE, H DESMURS-CLAVEL, J NINET, MH GIRARD-MADOUX  
MARSEILLE; B GRANEL  
MONTPELLIER; A KEYNOTE, A KHOU VAN KIEN, P RULLIER  
MONTPELLIER; A LE QUELLEC, S RIVIERE  
MONTPELLIER; D BESSIS  
MONTPELLIER; JD COHEN  
NANCY; C FARCAS  
NANCY; F GRANEL-BROCARD  
NANTES; C AGARD  
NANTES; C DURANT  
NICE; JG FUZIBET, V QUEYREL  
PARIS; A BEREZNE, L GUILLEVIN, L MOUTHON  
PARIS; C FRANCES  
PARIS; C TOLEDANO, J CABANE, K TIEV  
PARIS; D FARGE, H KESHTMAND  
PARIS; I LAZARETH, P PRIOLLET, U MICHON-PASTUREL  
PARIS; J WIPFF, N ASSOUS  
PERPIGNAN; O CARTRY  
PESSAC; E KOSTRZEWA, MS DOUTRE  
PONTOISE; L BLUM  
REIMS; Z REGUIAI  
RENNES; A LETREMY, A PERLAT, C CAZALETS-LACOSTE, O DECAUX, P JEGO  
ROUEN; AB DUVAL-MODESTE, O DEBOVES  
STRASBOURG; C SORDET, E CHATELUS, H CHIFFOT, J SIBILLIA  
TOULOUSE; B COURET, G MOULIS, L SAILLER  
TOULOUSE; D ADOUE  
TOULOUSE; F GACHES  
TOURS; E DIOT

VALENCE; F SKOWRON  
VALENCE; T ZENONE  
VALENCIENNES; T QUEMENEUR, X KYNDT  
VANDOEURVRE-LES-NANCY; D WAHL, S ZUILY, T MOLINE, V BRAVETTI

#### **GR – GREECE**

ALEXANDROUPOLIS; N GALANOPOULOS  
ATHENS; D VASILOPOULOS  
ATHENS; P VLACHOYANNOPOULOS  
HERAKLEIO/CRETA; I KRITIKOS  
IOANNINA; N TSIFETAKI  
LARISSA; A KOUTROUMBAS  
THESSALONIKI; A GARYFALLOS  
THESSALONIKI; P ATHANASSIOU  
THESSALONIKI; S ASLANIDIS  
THESSALONIKI; S KAMALI  
THESSALONIKI; T DIMITROULAS  
THESSALONIKI; V GALANOPOULO  
VOULA; A ELEZOGLOU

#### **IE – IRELAND**

DUBLIN; A GRIER, M MURRAY, M O'ROURKE

#### **IT – ITALY**

ANCONA; A GABRIELLI  
BARI; G LAPADULA  
BARI; L SERAFINO, N TERLIZZI  
BENEVENTO; S BELLISSIMO, S STISI  
BOLOGNA; N MALAVOLTA  
BRESCIA; P AIRO  
CAGLIARI; A VACCA  
CATANIA; E BATTAGLIA  
CATANIA; R FOTI  
CATANZARO; S MAZZUCA  
FERRARA; A BORTOLUZZI, F TROTTA  
FIRENZE; F GALLUCCIO  
FOGGIA; A MARUCCI, F CANTATORE  
FOGGIA; R BUCCI  
GENOVA; F PUPPO  
JESI; R DE ANGELI, W GRASSI  
L'AQUILA; P CIPRIANI  
LEGNANO; A MAZZONE, P FAGGIOLI  
MILAN; A SEVERINO, R SCORZA  
MILAN; L BELLOLI, N UGHI  
MILAN; M ANTIVALLE  
MILAN; N DEL PAPA, W MAGLIONE  
MILAN; S ZENI  
MODENA; C FERRI, M COLACI  
MORMANNO; G VARCASIA  
NAPOLI; G CUOMO  
PADUA; F COZZI  
PALERMO; G TRIOLO  
PASSIRANA DI RHO; S GATTI  
PAVIA; CM MONTECUCCO  
PISA; M DOVERI  
POTENZA; A NIGRO, I OLIVIERI  
REGGIO EMILIA; G BAJOCCHI

ROMA; E ROSATO, F SALSANO  
ROMA; F FAUSTINI, G FERRACCIOLI  
ROMA; L COLONNA  
ROMA; S PALLOTTA  
ROMA; V RICCIERI  
ROME; A MUSSI  
SIENA; F BELLISAI, M GALEAZZI  
TURIN; E FUSARO  
TURIN; M SARACCO, R PELLERITO  
UDINE; P MASOLINI, S DE VITA, S LOMBARDI  
VERONA; C LUNARDI

**NL – THE NETHERLANDS**

ALKMAAR; J D MOOLENBURGH  
AMERSFOORT; AHM HEURKENS  
AMSTERDAM; A VOSKUYL  
AMSTERDAM; AE HAK, ESK STROES, J REMANS  
AMSTERDAM; V GERDES  
APELDOORN; JM VAN WOERKOM  
ARNHEM; AJL DE LONG, HAH KAASIJAGER, H VISSER, M JANSSEN  
BRIDA; C VAN GULDENER, F VAN NEER, P VOS  
DELFT; AJ PETERS  
DEN HAAG; H HULSMANS, K RONDAY, R GOEKOOP  
DEN HAAG; J EWALS, R VALENTIJN  
DEN HAAG; M DE BOIS  
DEN HAAG; ML WESTEDT  
DEVENTER; D SIEWERTSZ VAN REESEMA  
EDE; E KNIFJ-DUTMER, JN STOLK  
EINDHOVEN; H WILLEMS  
EMMELOORD; DG KUIPER-GEERTSMA, P BAUDAOIN  
EMMEN; P FRETTER, R WESTRA  
GOES; PBJ SONNAVILLE  
GRONINGEN; A SMIT, H BOOTSMA, L BROUWER, M BIJL, N MOLDERS  
HARDENBERG; C LEBRUN  
HARDERWIJK; MJ VAN DER VEEN  
HEERENVEEN; M NOORDZIJ  
HEERLEN; H HOUBEN, RMB LANDEWE, W VERCOUTERE  
HILVERSUM; ZN JAHANGIER DE VEEN  
HOOGEVEEN; TR ZIJLSTRA  
LEEWARDEN; F UBELS, G BRUYN, P JANSEN  
LEIDEN; A SCHUERWEGH, TWJ HUIZINGA  
MAASTRICHT; P PAASSEN, T HURKENS  
NIEUWEGEIN; M GEURTS  
NIJMEGEN; F VAN DEN HOOGEN  
NIJMEGEN; M VONK  
ROERMOND; PJC JACOBS  
ROOSENDAAL; JHLM GROENENDAEL, P SEYS  
ROTTERDAM; D VAN ZEBEN, H VAN PAASSEN, J GROENENDAEL  
ROTTERDAM; KH HAN, M WLARVENS  
ROTTERDAM; M VAN HAGEN, P VAN DAELE, R DOLHAIN  
SCHIEDAM; AH GERARDS, P VAN DER LUBBE  
TILBURG; M DE KANTER, WH MULLER  
UTRECHT; E TON  
VLISSINGEN; M VAN KRUGTEN  
WINSCHOTEN; I VAN GAMEREN  
WINTERSWIJK; P LANTING  
WOERDEN; C DEN HENGST

**NO – NORWAY**

BERGEN; CG GJESSDAL, SL HJERTAKER, TM MADLAND

KRISTIANSAND; A BENDVOLD, H BITTER

OSLO; AM HOFFMANN-VOLD, O MIDTVEDT

TROMSO; G BAKLAND, HK ASLKAKSEN, M SEIP, S KALSTAD, W KOLDINGSNES

TRONDHEIM; B GRANDAUENT, BY NORDVAG, EK STRAN, J SKOMSVOLL, M ANDERSEN, RS THOMSEN, T PEDERSEN, V BAKKEHEIM

**PT – PORTUGAL**

ALMADA; A CORDEIRO

AMADORA; J ALVES, S OLIVEIRA

LISBOA; P COELHO

LISBON; C RESENDE, C PONTE

PORTO; I ALMEIDA, I SILVA

SANTAREM; C SANTOS, I CAMARA, J COSTA

**SE – SWEDEN**

FALUN; H HELLSTROM

HELSINGBORG; A MOHAMMAD

KARLSKRONA; I LIND, K LIND, T BRACIN

KARLSTAD; E LILJEQUIST, T VINGREN

KRISTIANSTAD; A OSTENSON

LINKOPING; E HERMANSSON

OSKARSTROM; C THORSSON, M SODERLIN

STOCKHOLM; A NORDIN, E WALDHEIM, K VENGEYR, K ALBERTSSON, ML KARLSSON, Y RYDVALD

VASTERAS; M RIZK

**SI – SLOVENIA**

LIUBLJANA; AS DOLNICAR

**SK – SLOVAKIA**

PIESTANY; J LUKAC

**UK – UNITED KINGDOM**

BATH; J JAMES, N MCHUGH, S COLE, S BROWN

BELFAST; A HAMILTON

BIRMINGHAM; A FAIZAL

CAMBRIDGE; F HALL, K MURPHY, S SKINGLE

FIFE; H HARRIS

GLASGOW; F MADHOK, R HAMPSON

HULL; E BAGULEY, O OGUNBAMBI

LIVERPOOL; J LAMB, M ANDERSON, R MOOTS

LONDON; B WHITE-ALAO, C MORRISON, J DOBSON, P GORDON, R SALERNO

LONDON; C DENTON, L PARKER, R OCHIEL, R VINCENT, S ZIMBA, T NGCOZANA, Y XU

LONDON; D D'CRUZ, LM CHOONG

MANCHESTER; A HERRICK, E WRAGG, J MANNING, T MOORE

ROMFORD; C KELSEY, K CHAKRAVARTY

SOUTHPORT; H SKYES

WORCESTER; P ATHIVEER
