# Supplementary material for: Demographic, clinical and antibody characteristics of patients with digital ulcers in systemic sclerosis: data from the DUO Registry
Source: PubMed Central journal article supplement — Ann Rheum Dis. 2012 Jan 12;71(5):718–21. doi: 10.1136/annrheumdis-2011-200631 (PMC3329234; doi:10.1136/annrheumdis-2011-200631), 2012-01-12
Supplement: ard-71-5-0718-s1.pdf [file ard-71-5-0718-s1.pdf]

## Supplementary table

**Table S1: Ongoing medications/therapies at enrolment**

| <b>Medications/therapies<br/>(use for any reason)</b>                                                                          | <b>Number of<br/>patients, n<br/>(%)*</b> |
|--------------------------------------------------------------------------------------------------------------------------------|-------------------------------------------|
| Non-opioid analgesics and NSAIDs                                                                                               | 714 (29.3)                                |
| Opioids                                                                                                                        | 238 (9.8)                                 |
| Corticoids                                                                                                                     | 792 (32.5)                                |
| Anticoagulants                                                                                                                 | 438 (18.0)                                |
| Immunosuppressants                                                                                                             | 717 (29.4)                                |
| Systemic antibiotics                                                                                                           | 344 (14.1)                                |
| ERA**                                                                                                                          | 1157 (47.4)                               |
| Calcium channel blockers                                                                                                       | 1058 (43.4)                               |
| Prostacyclins                                                                                                                  | 828 (33.9)                                |
| Phosphodiesterase-5 inhibitors                                                                                                 | 124 (5.1)                                 |
| Other medications                                                                                                              | 1616 (66.3)                               |
| Topical DU treatments                                                                                                          | 520 (21.3)                                |
| *Denominator = all patients = 2439; **ERA= bosentan or other<br>ERA;<br>DU, digital ulcer; ERA, endothelin receptor antagonist |                                           |
